# Supplementary material for: Post-mortem Findings of Inflammatory Cells and the Association of 4-Hydroxynonenal with Systemic Vascular and Oxidative Stress in Lethal COVID-19
Source: MDPI journal article supplement (doi:10.3390/cells11030444), 2022-01-27
Supplement: s1 [file s1]

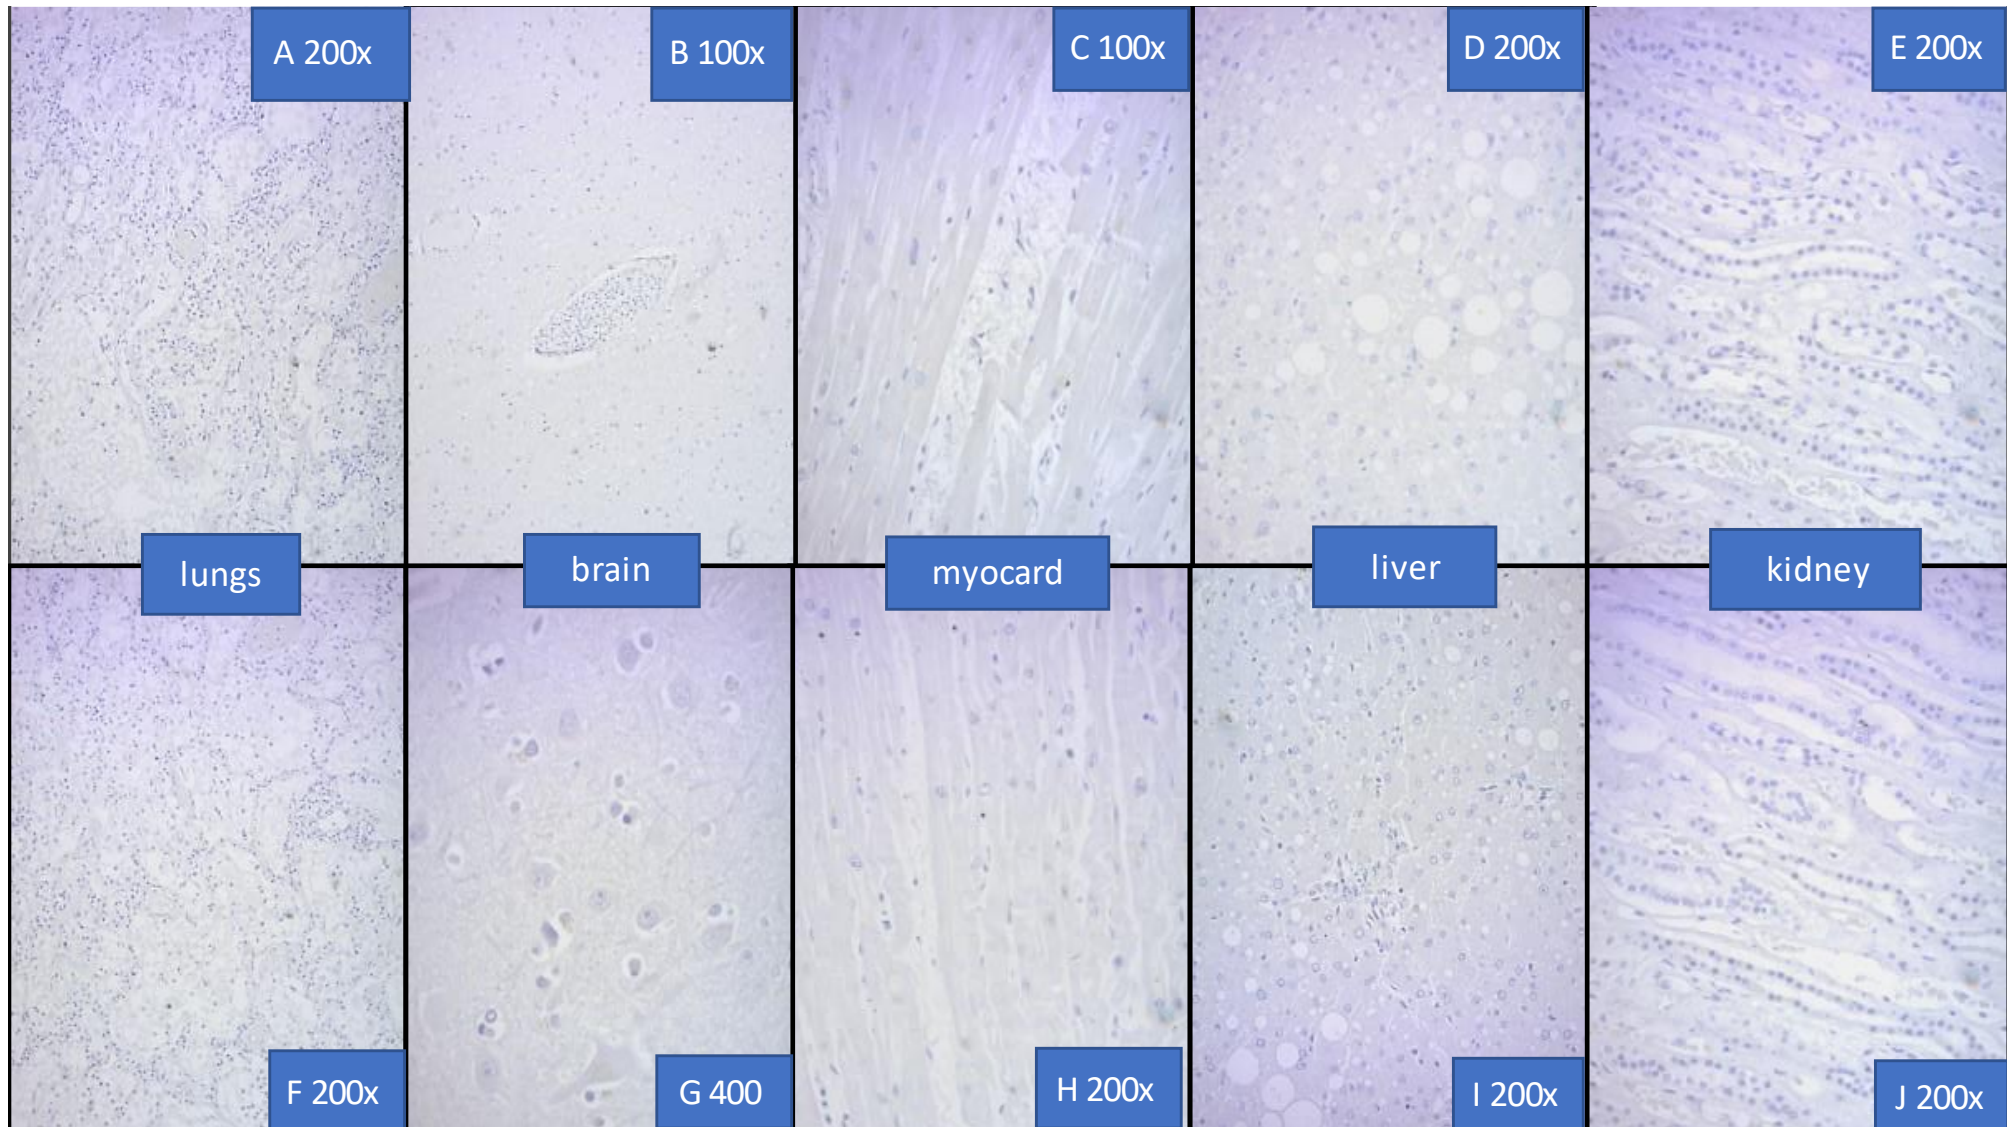

Figure S1. Supplementary Figure with negative control immunohistochemistry slides, processed without primary antibodies. Photos A, B, C, D, and E show negative controls that were obtained while immunohistochemistry was done for 4-HNE. Photos F, G, H, I, and J show negative controls that were obtained while immunohistochemistry was done for SOD2. The organs analysed and the magnifications used are indicated on the Figure.
